# Supplementary material for: Impact of Insecticide-Treated Net Ownership on All-Cause Child Mortality in Malawi, 2006–2010
Source: PubMed Central journal article supplement (PMC5619930; doi:10.4269/ajtmh.15-0929), 2017-09-27
Supplement: tpmd150929.SD1.pdf [file tpmd150929.SD1.pdf]

## The following are supplemental materials and will be published online only

doi:10.4269/ajtmh.15-0929.s001

### SUPPLEMENTAL APPENDIX

The rapid expansion of malaria control interventions in Malawi did not occur in a vacuum. Many other concomitant changes in economic, social, and health factors were also underway. Results from this analysis found that risk of under-five death was lower in districts with greater coverage of vitamin A supplementation in children less than 5 years of age. Vitamin A coverage was measured for the 6 months preceding each survey. The direction of effect was counterintuitive for coverage of tetanus immunization in women. Children living in districts in which a large proportion of the women with births in the past 2 years received at least two tetanus immunizations had higher mortality risk than those from districts with low tetanus immunization coverage in women. As tetanus immunizations are administered during ANC visits, it could be that women with higher risk pregnancies are more likely to interface with formal health-care providers during pregnancy and therefore are more likely to receive two doses of tetanus immunization.

Interestingly, rainfall and  $PfPR_{2-10}$  were not significant predictors of child mortality in either the individual-level or the district-level multivariable model. It is possible that the climate of Malawi over the periods investigated is not sufficiently

heterogeneous for these factors to affect the association between ITNs and child mortality. Similarly,  $PfPR_{2-10}$  is a temporally static value representative of the baseline malaria transmission. There is also little spatial variation in  $PfPR_{2-10}$  in Malawi when aggregated to the district level. It is therefore not surprising that no association is seen with child mortality given the lack of heterogeneity in the measure and the many other causes of child mortality. Bennett and others used model-based geostatistical methods to look at change in  $PfPR_{2-10}$  in Malawi between 2000 and 2010 and found no evidence of a reduction.<sup>31</sup> This could be due in part to the role of climatic factors that led 2010 to have higher prevalence than expected. It could also be due to the lack of sensitivity of  $PfPR_{2-10}$  to detect meaningful changes in force of infection and/or transmission in settings of medium to high transmission. For example, Giardina and others used spatial and temporal analysis to look at the effects of vector-control interventions on malaria parasitemia in sub-Saharan Africa (SSA).<sup>32</sup> They found variation in the association between intervention coverage and parasitemia risk between and within countries. In some regions no decline in parasitemia prevalence was detected despite significant intervention effects.

SUPPLEMENTAL TABLE 1

Survey weighted counts of deaths of children less than 5 years of age and sample population at the district level using data from birth histories from the 2010 DHS\*

| District    | 2006   |            | 2007   |            | 2008   |            | 2009   |            | 2010   |            |
|-------------|--------|------------|--------|------------|--------|------------|--------|------------|--------|------------|
|             | Deaths | Population | Deaths | Population | Deaths | Population | Deaths | Population | Deaths | Population |
| Chitipa     | 3      | 1,304      | 4      | 1,363      | 2      | 1,389      | 1      | 1,413      | 2      | 1,005      |
| Karonga     | 3      | 1,289      | 6      | 1,386      | 2      | 1,440      | 6      | 1,470      | 3      | 1,110      |
| Nkhatabay   | 5      | 1,246      | 7      | 1,275      | 3      | 1,291      | 3      | 1,279      | 2      | 947        |
| Rumphi      | 3      | 1,297      | 4      | 1,365      | 3      | 1,404      | 3      | 1,391      | 2      | 956        |
| Mzimba      | 52     | 1,487      | 22     | 1,552      | 32     | 1,593      | 23     | 1,568      | 14     | 1,114      |
| Kasungu     | 27     | 1,546      | 25     | 1,661      | 21     | 1,681      | 39     | 1,731      | 10     | 1,225      |
| Nkhota kota | 6      | 1,511      | 10     | 1,574      | 11     | 1,587      | 9      | 1,563      | 7      | 1,209      |
| Ntchisi     | 7      | 1,317      | 6      | 1,393      | 3      | 1,458      | 6      | 1,436      | 1      | 1,030      |
| Dowa        | 7      | 1,215      | 9      | 1,331      | 18     | 1,385      | 18     | 1,386      | 6      | 1,021      |
| Salima      | 16     | 1,314      | 15     | 1,390      | 17     | 1,396      | 15     | 1,459      | 3      | 990        |
| Lilongwe    | 56     | 1,622      | 57     | 1,677      | 51     | 1,705      | 56     | 1,719      | 31     | 1,205      |
| Mchinji     | 14     | 1,474      | 16     | 1,546      | 10     | 1,579      | 22     | 1,600      | 11     | 1,153      |
| Dedza       | 21     | 1,393      | 23     | 1,437      | 22     | 1,476      | 44     | 1,453      | 18     | 1,005      |
| Ntcheu      | 18     | 1,438      | 26     | 1,506      | 17     | 1,468      | 19     | 1,405      | 7      | 1,042      |
| Mangochi    | 30     | 1,325      | 29     | 1,426      | 18     | 1,508      | 51     | 1,539      | 17     | 1,110      |
| Machinga    | 15     | 1,443      | 10     | 1,488      | 15     | 1,560      | 17     | 1,546      | 8      | 1,158      |
| Zomba       | 19     | 1,334      | 21     | 1,440      | 25     | 1,505      | 26     | 1,484      | 11     | 1,034      |
| Chiradzulu  | 10     | 1,198      | 9      | 1,228      | 7      | 1,247      | 6      | 1,182      | 7      | 920        |
| Blantyre    | 39     | 1,554      | 27     | 1,579      | 30     | 1,590      | 23     | 1,566      | 21     | 1,197      |
| Mwanza      | 3      | 1,274      | 2      | 1,309      | 2      | 1,323      | 2      | 1,266      | 1      | 919        |
| Thyolo      | 16     | 1,403      | 11     | 1,473      | 10     | 1,528      | 19     | 1,417      | 5      | 976        |
| Mulanje     | 17     | 1,395      | 25     | 1,443      | 21     | 1,440      | 16     | 1,394      | 14     | 985        |
| Phalombe    | 13     | 1,521      | 8      | 1,656      | 14     | 1,693      | 11     | 1,704      | 6      | 1,151      |
| Chikwawa    | 29     | 1,417      | 18     | 1,446      | 19     | 1,545      | 21     | 1,515      | 20     | 1,187      |
| Nsanje      | 11     | 1,382      | 7      | 1,458      | 9      | 1,497      | 10     | 1,512      | 5      | 1,126      |
| Balaka      | 10     | 1,378      | 8      | 1,395      | 8      | 1,448      | 16     | 1,465      | 4      | 1,035      |
| Neno        | 3      | 1,228      | 2      | 1,290      | 2      | 1,311      | 2      | 1,290      | 1      | 921        |
| Total       | 453    | 37,305     | 407    | 39,087     | 392    | 40,047     | 484    | 39,753     | 237    | 28,731     |

\*These are weighted estimates of under-five deaths.
